# Supplementary material for: Phytoecdysteroids from the Roots of Achyranthes bidentata Blume
Source: MDPI journal article supplement (doi:10.3390/molecules17033324), 2012-03-14

## Supplemental Material

In this “Supplement Material” file for the manuscript “Phytoecdysteroids from the Roots of *Achyranthes bidentata* Blume”, 1D and 2D NMR spectra of new compounds **1–2** are available here as exhibited below.

### Contents:

Page 2–7:  $^1\text{H}$ - and  $^{13}\text{C}$ -(DEPT)-NMR, HSQC, HMBC,  $^1\text{H}$ - $^1\text{H}$  COSY and NOESY of **1**;

Page 8–13:  $^1\text{H}$ - and  $^{13}\text{C}$ -(DEPT)-NMR, HSQC, HMBC,  $^1\text{H}$ - $^1\text{H}$  COSY and NOESY of **2**.

# <sup>1</sup>H-NMR of compound 1.

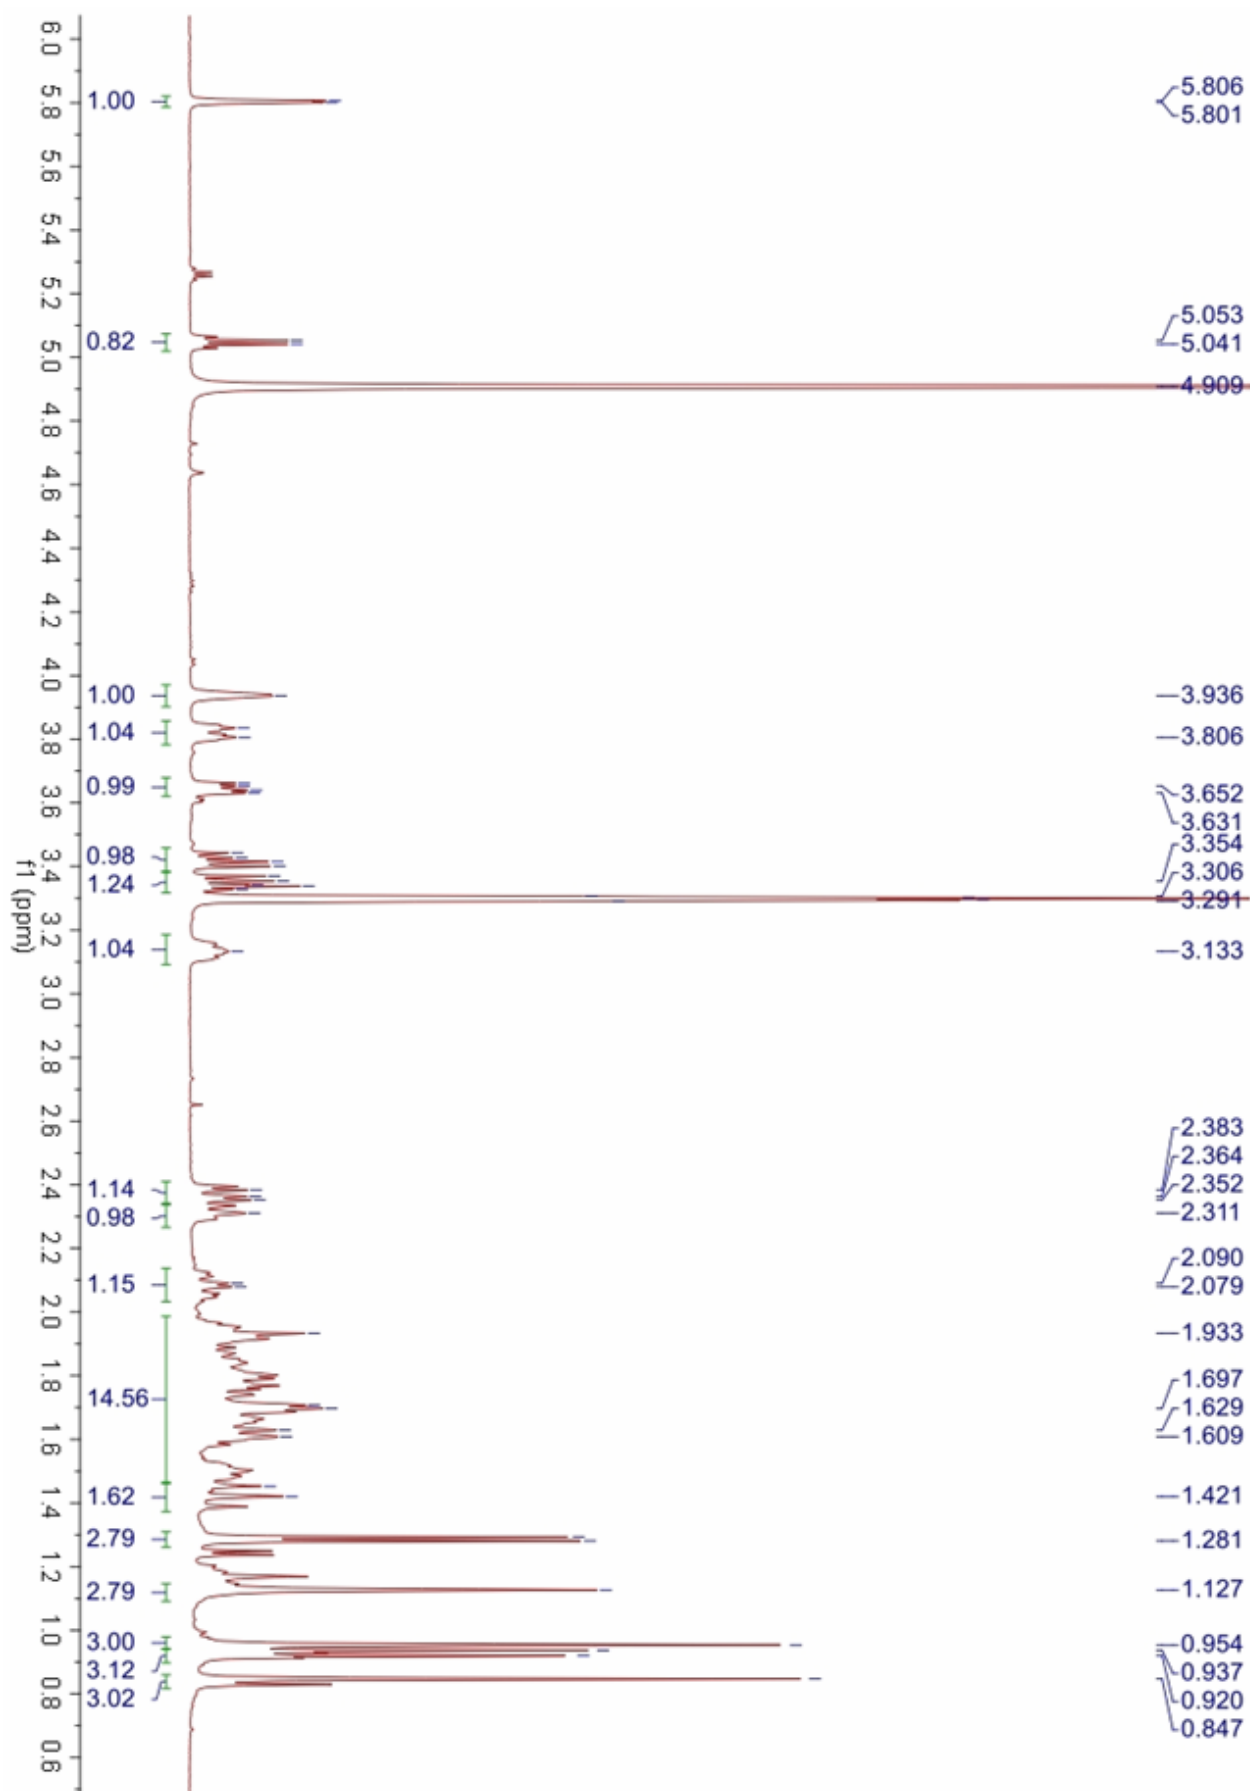

# <sup>13</sup>C (DEPT) NMR of compound 1.

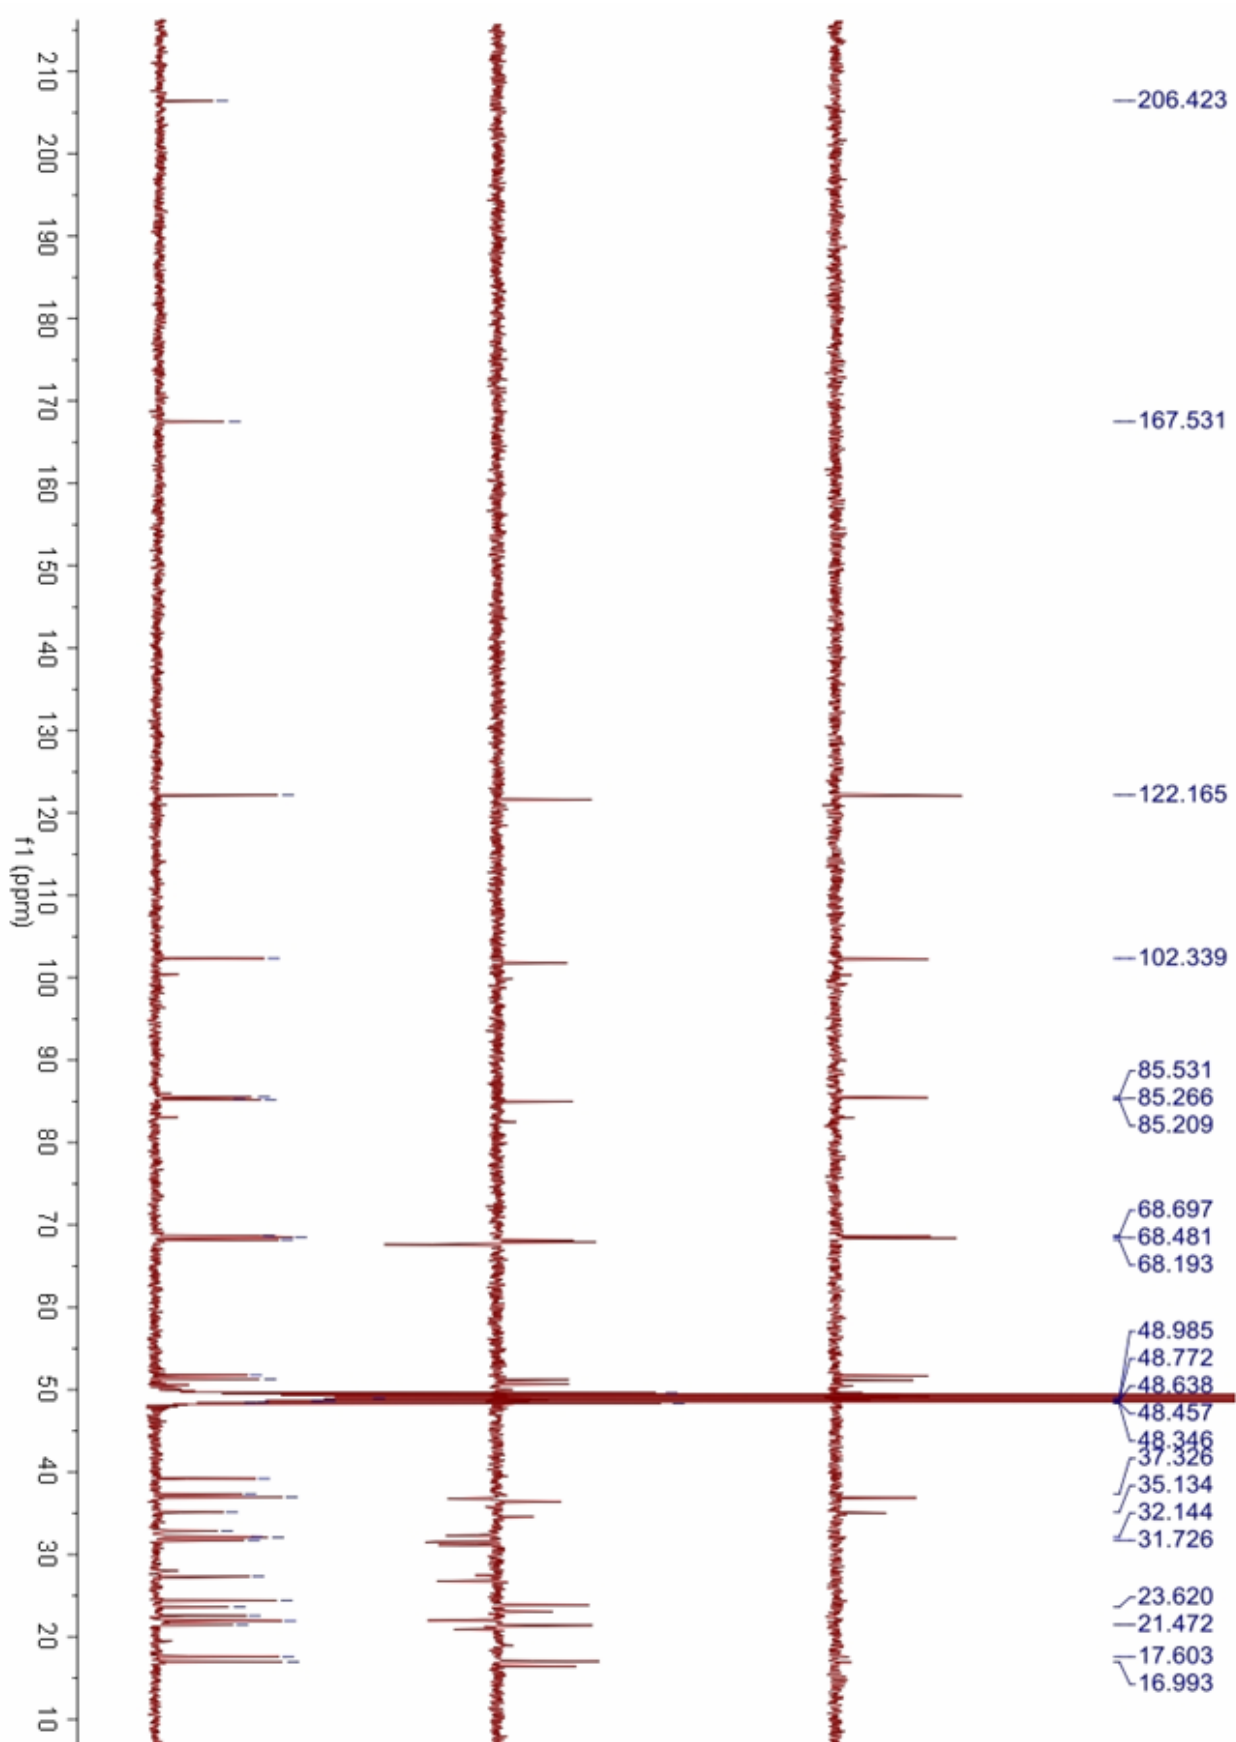

# HSQC of compound 1.

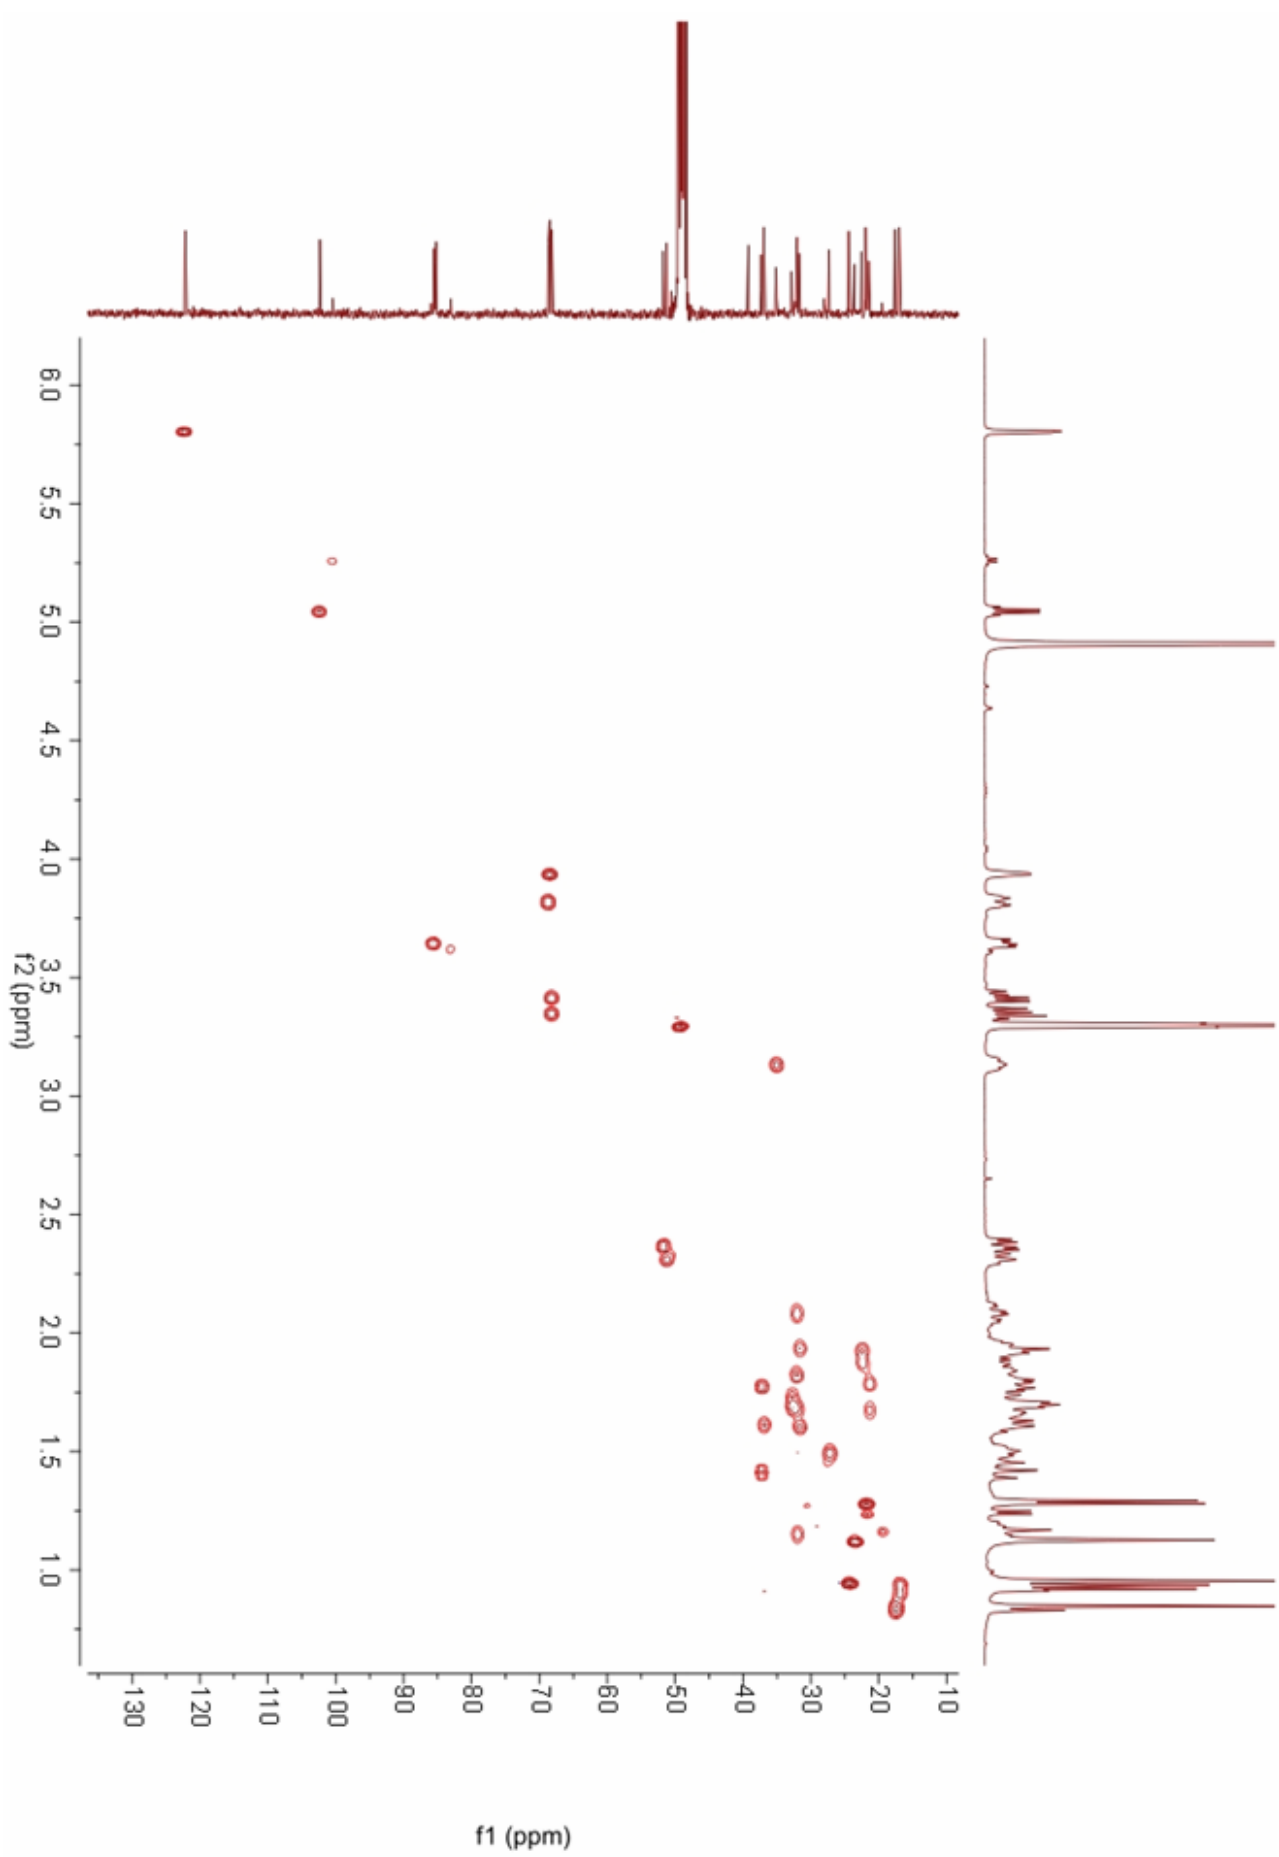

# HMBC of compound 1.

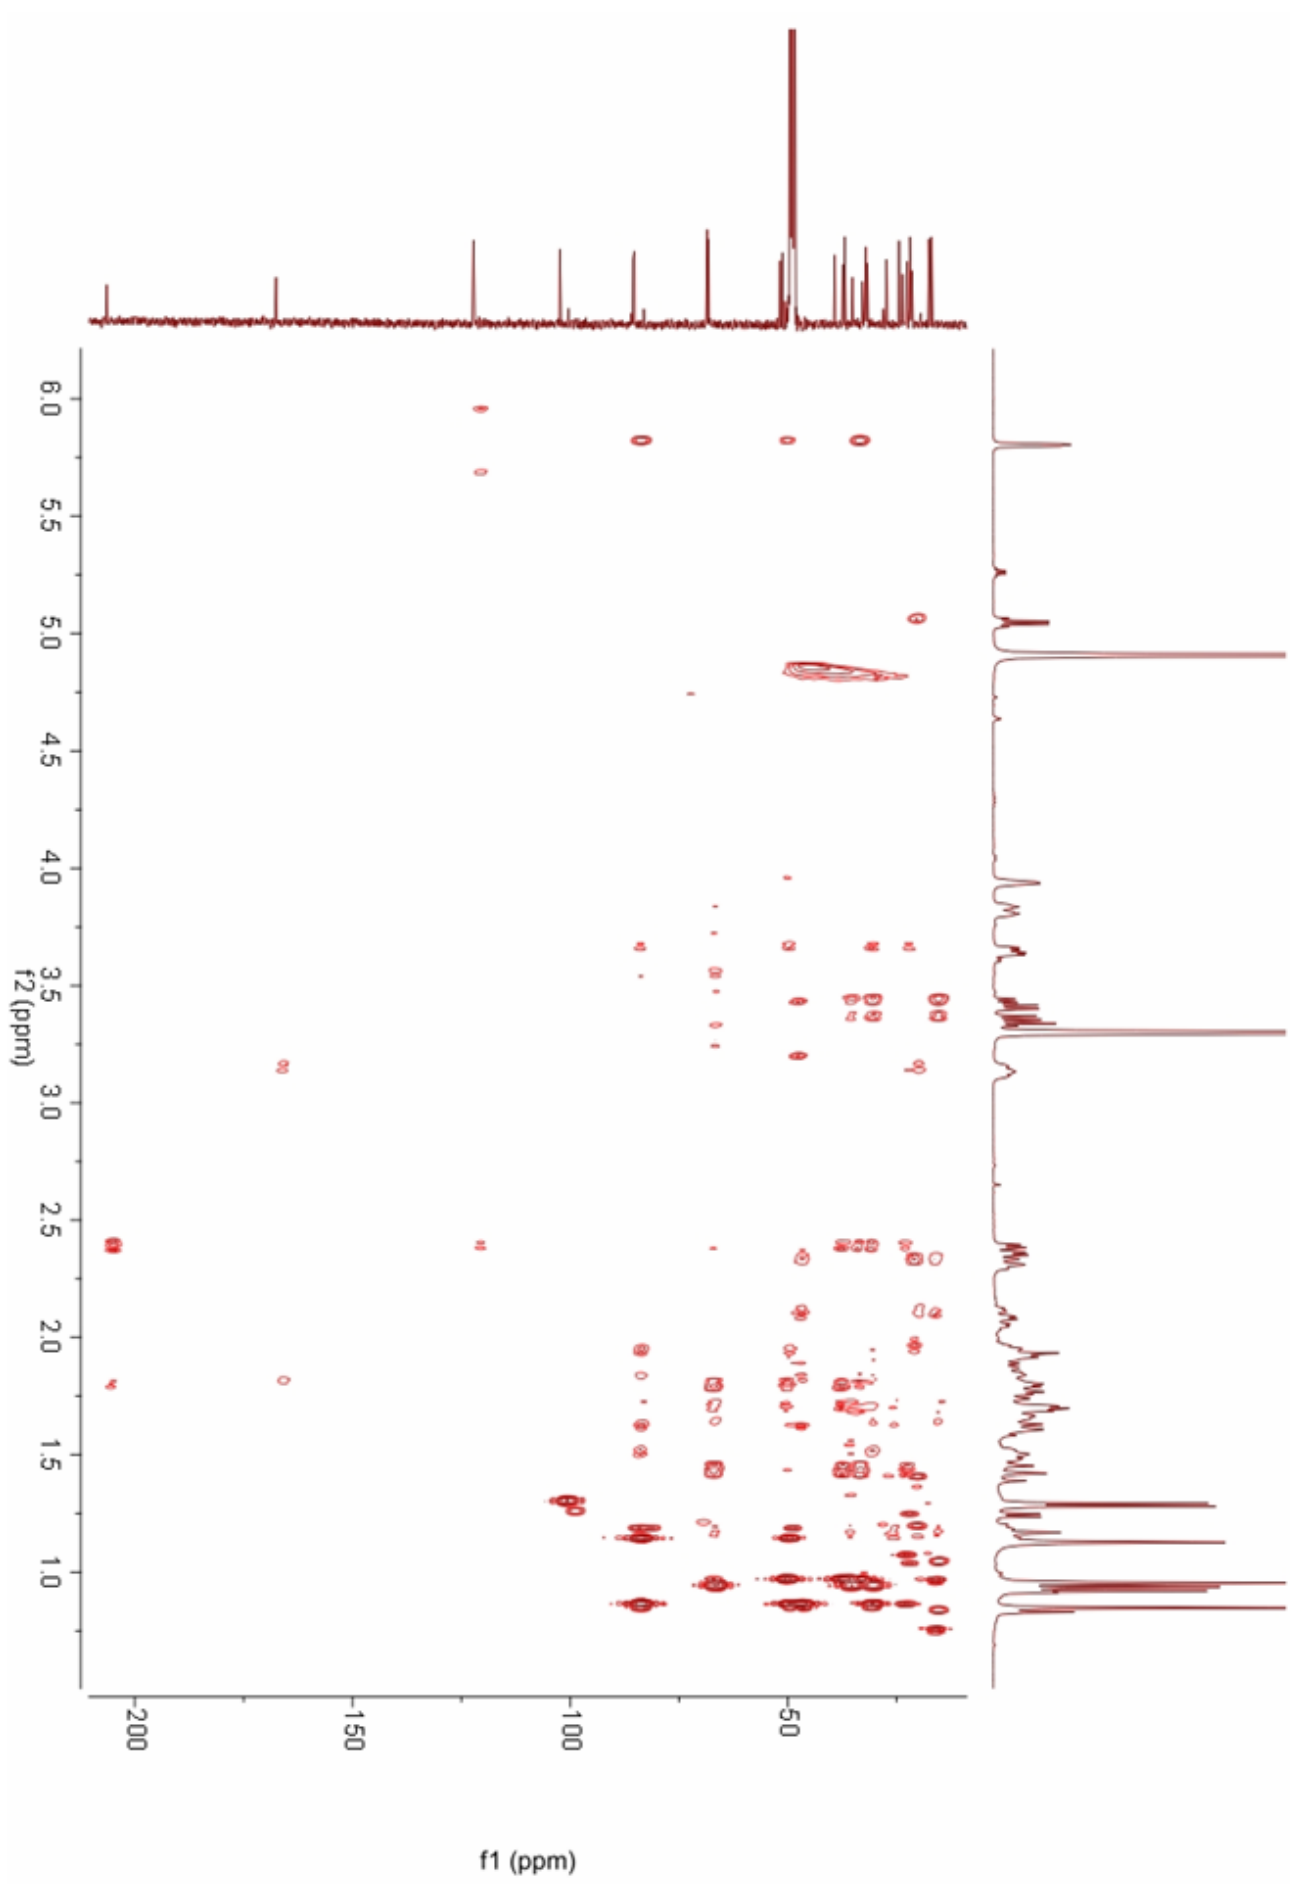

$^1\text{H}$ - $^1\text{H}$  COSY of compound 1.

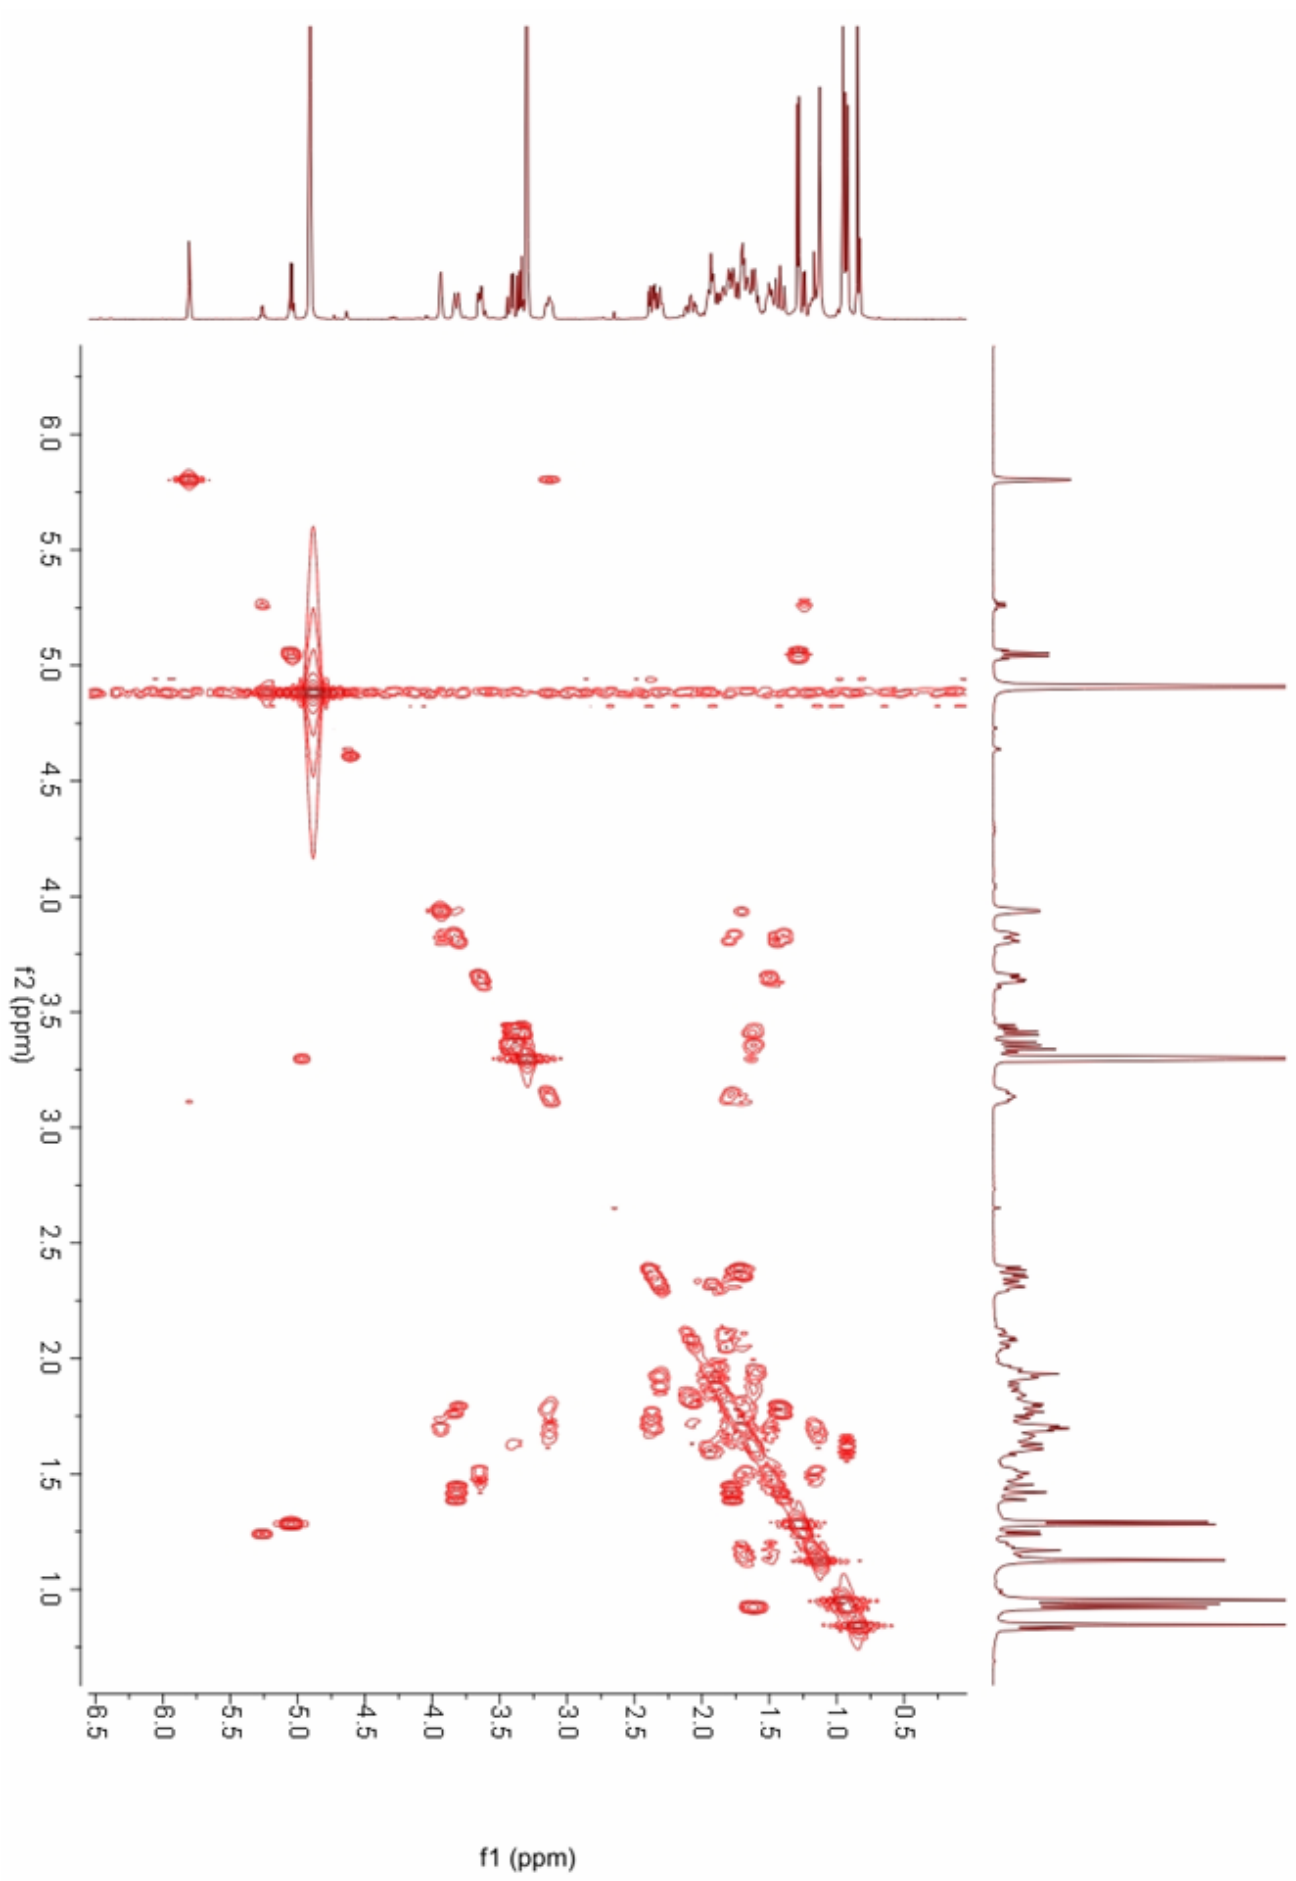

# NOESY of compound 1.

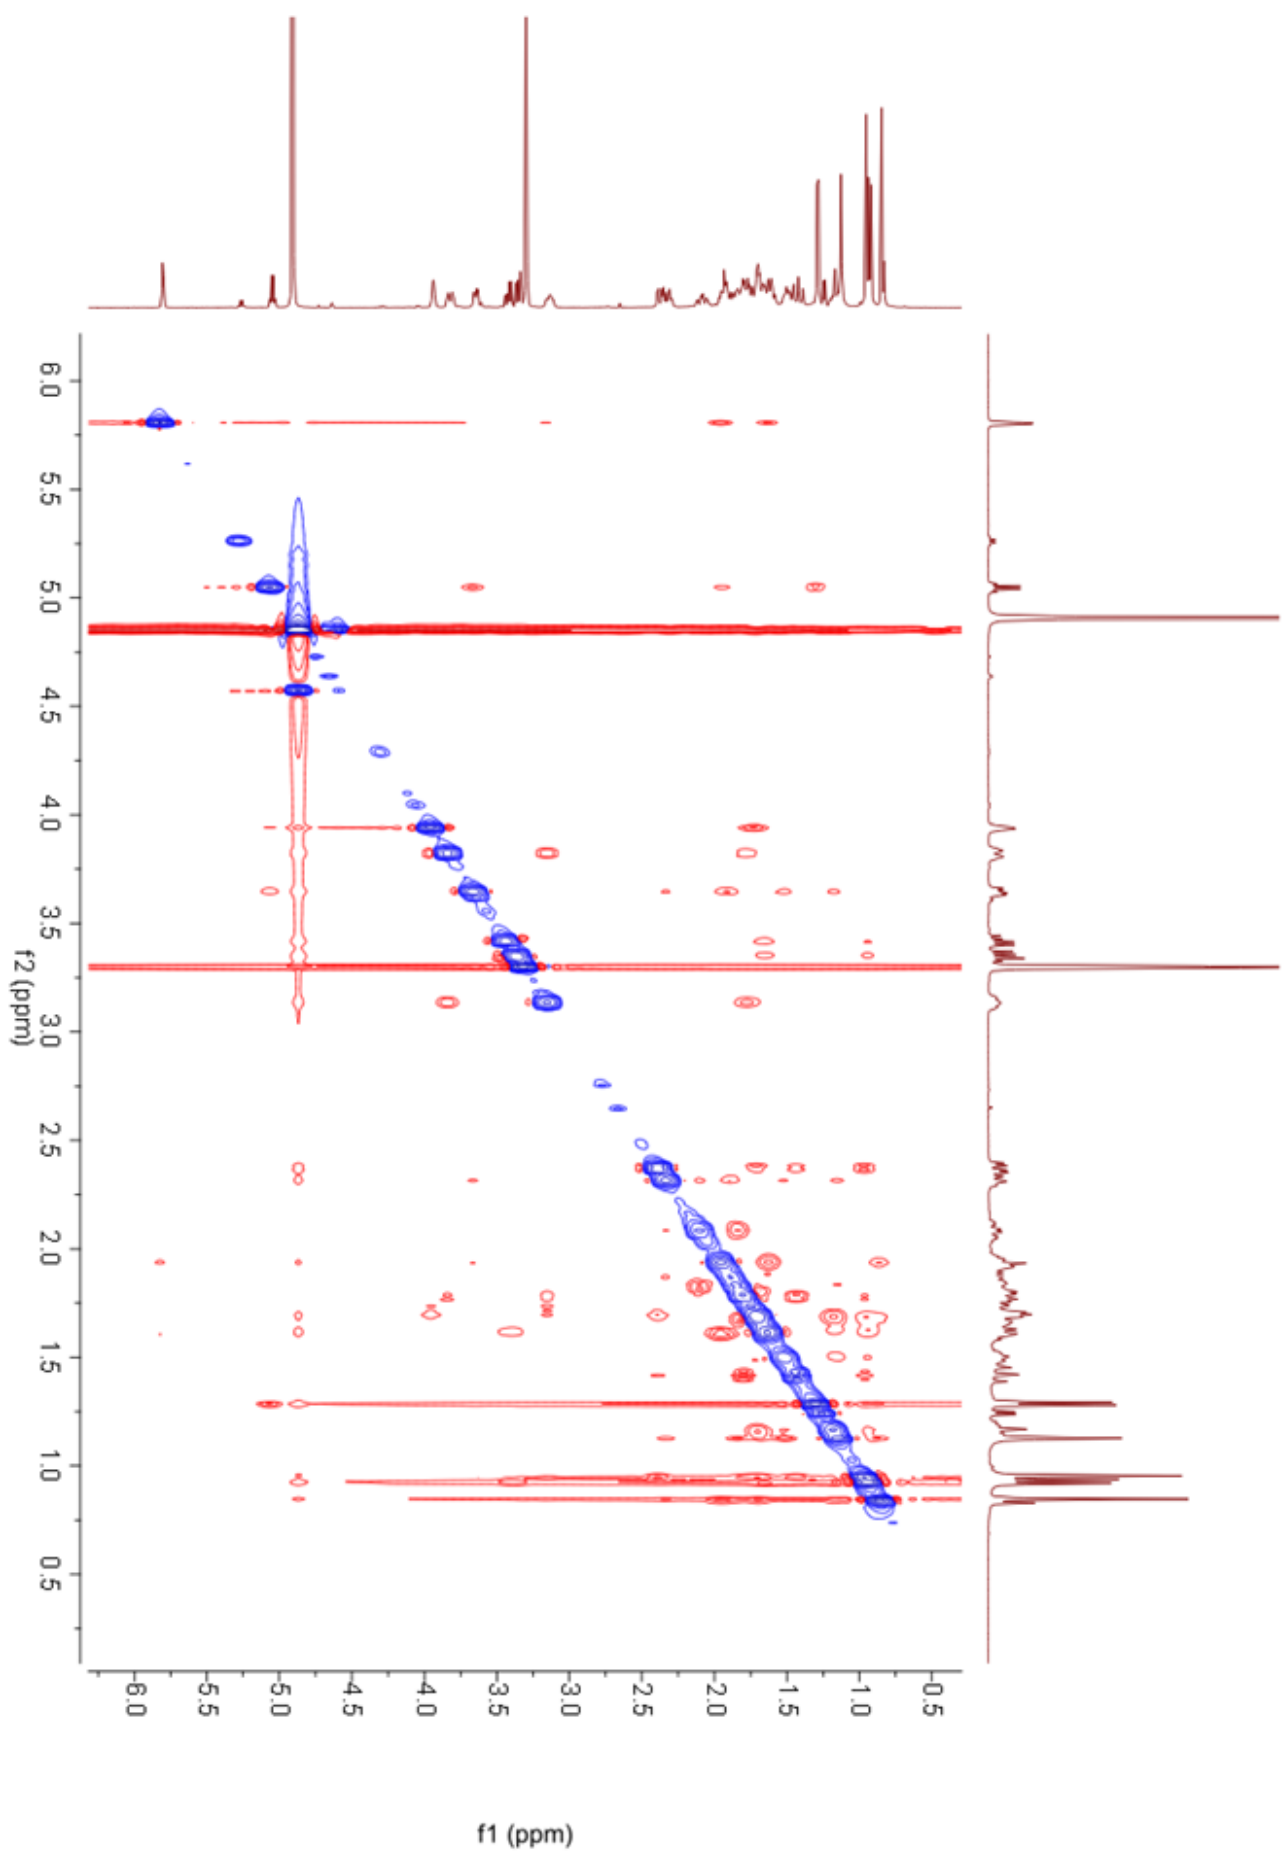

# <sup>1</sup>H-NMR of compound 2.

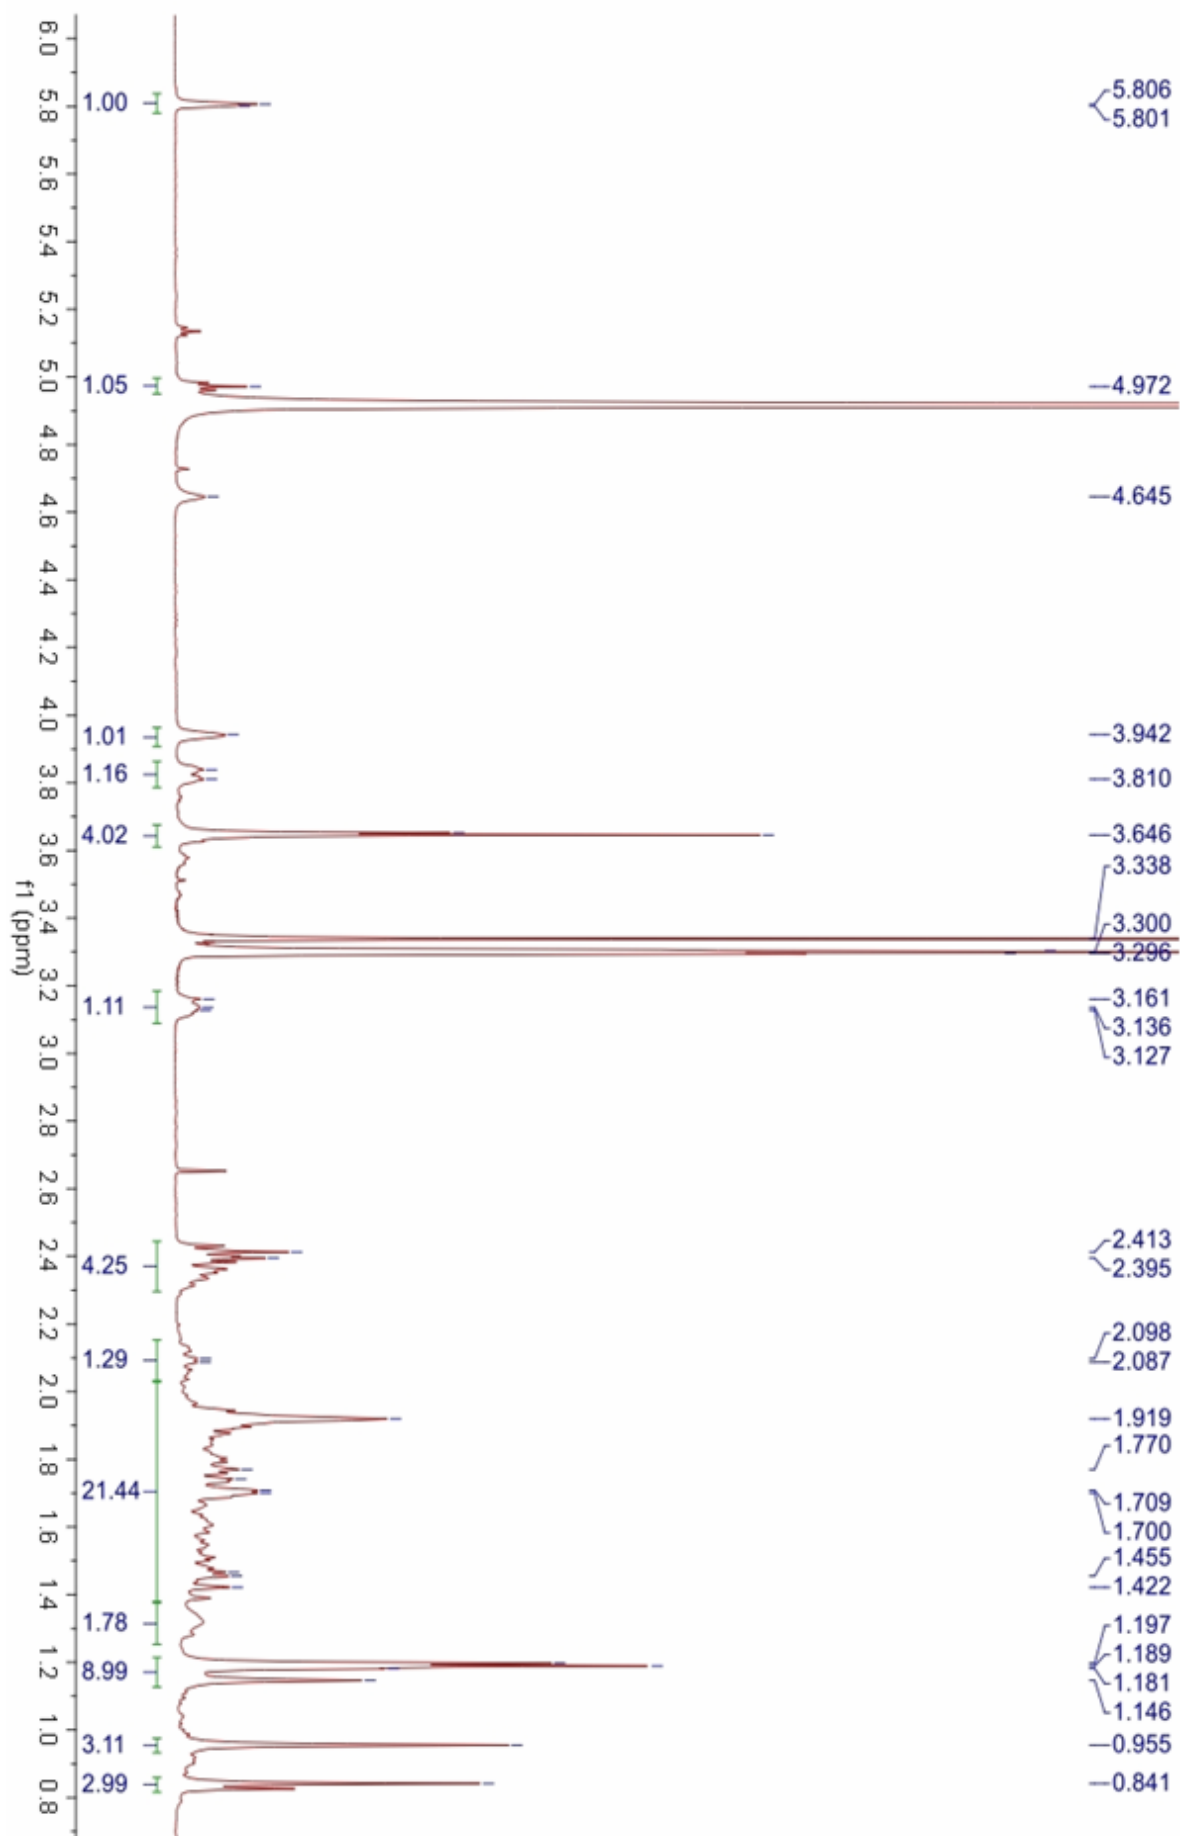



# <sup>13</sup>C (DEPT) NMR of compound 2.

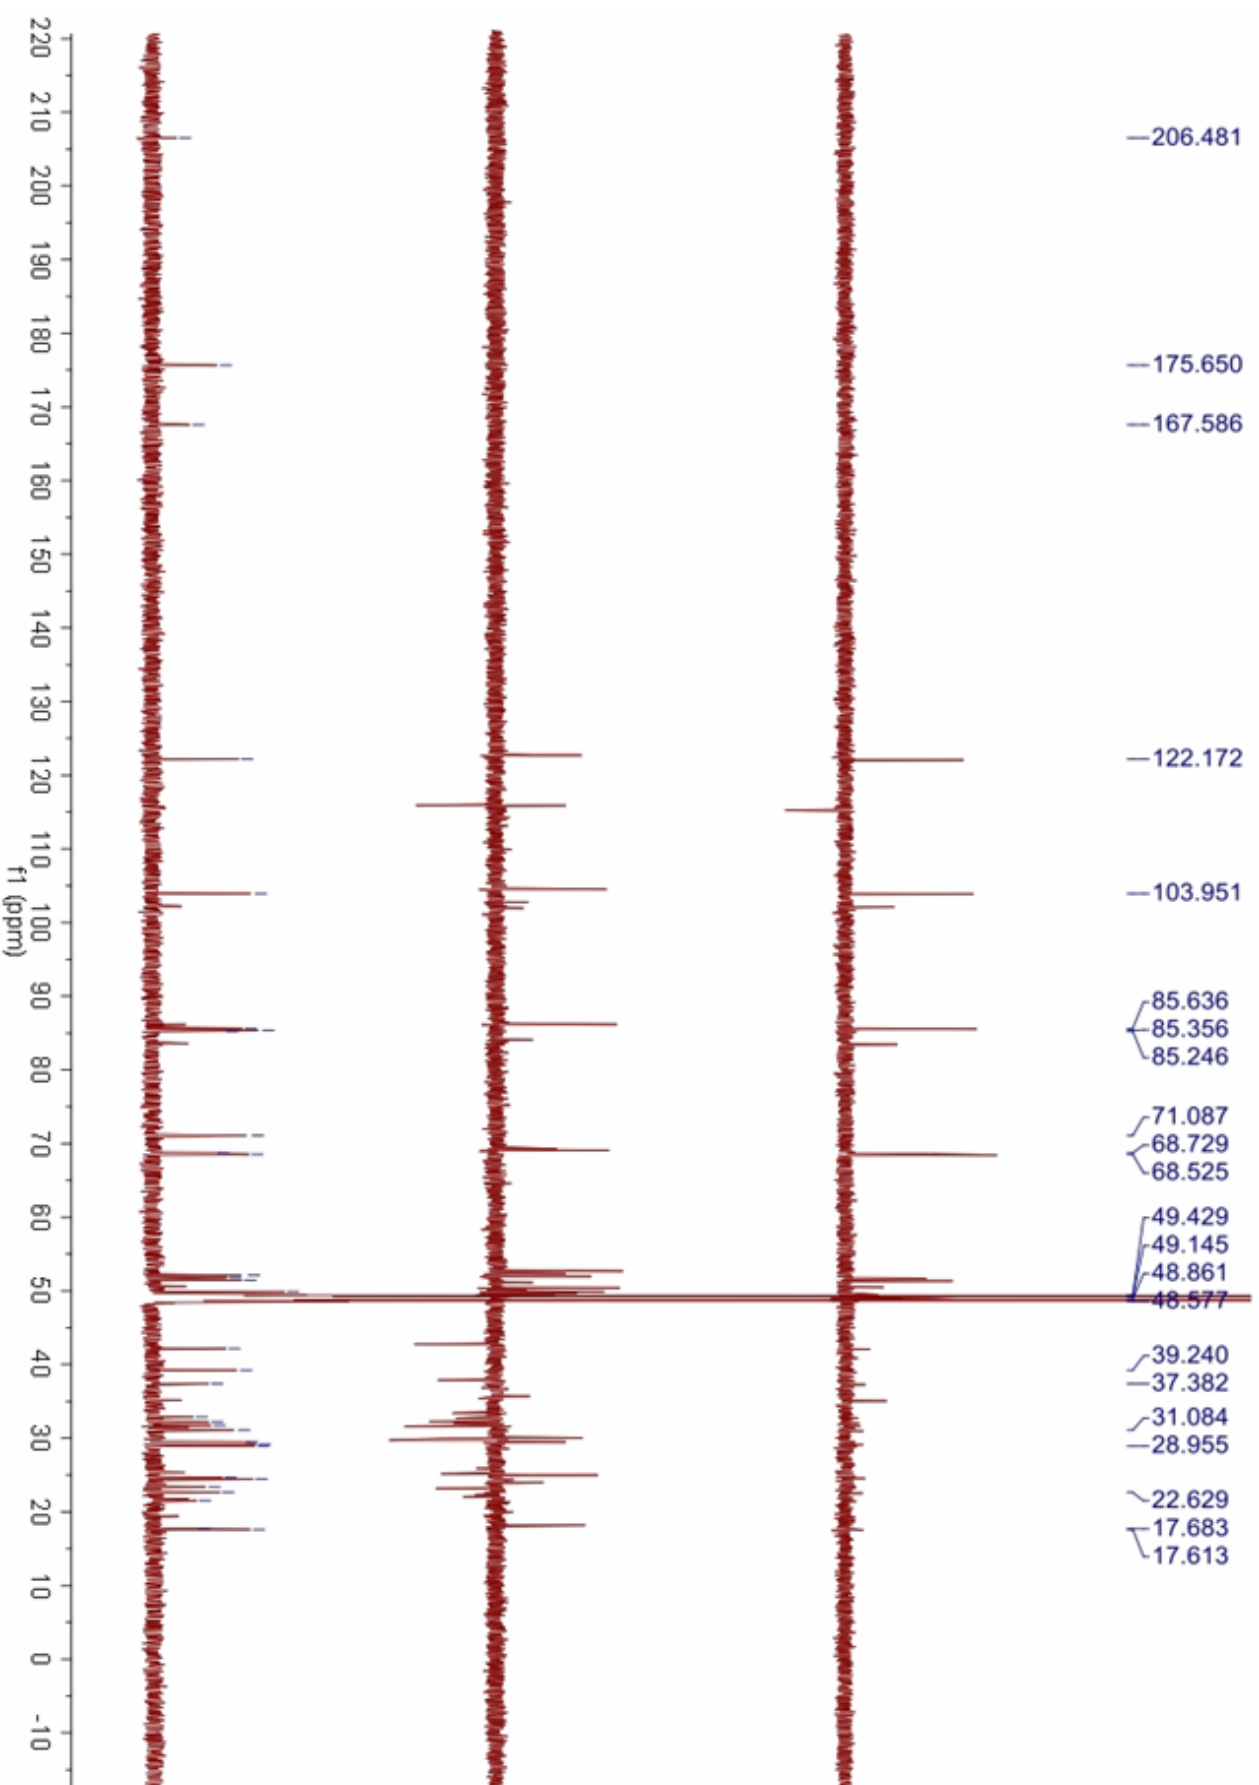

## HSQC of compound 2.

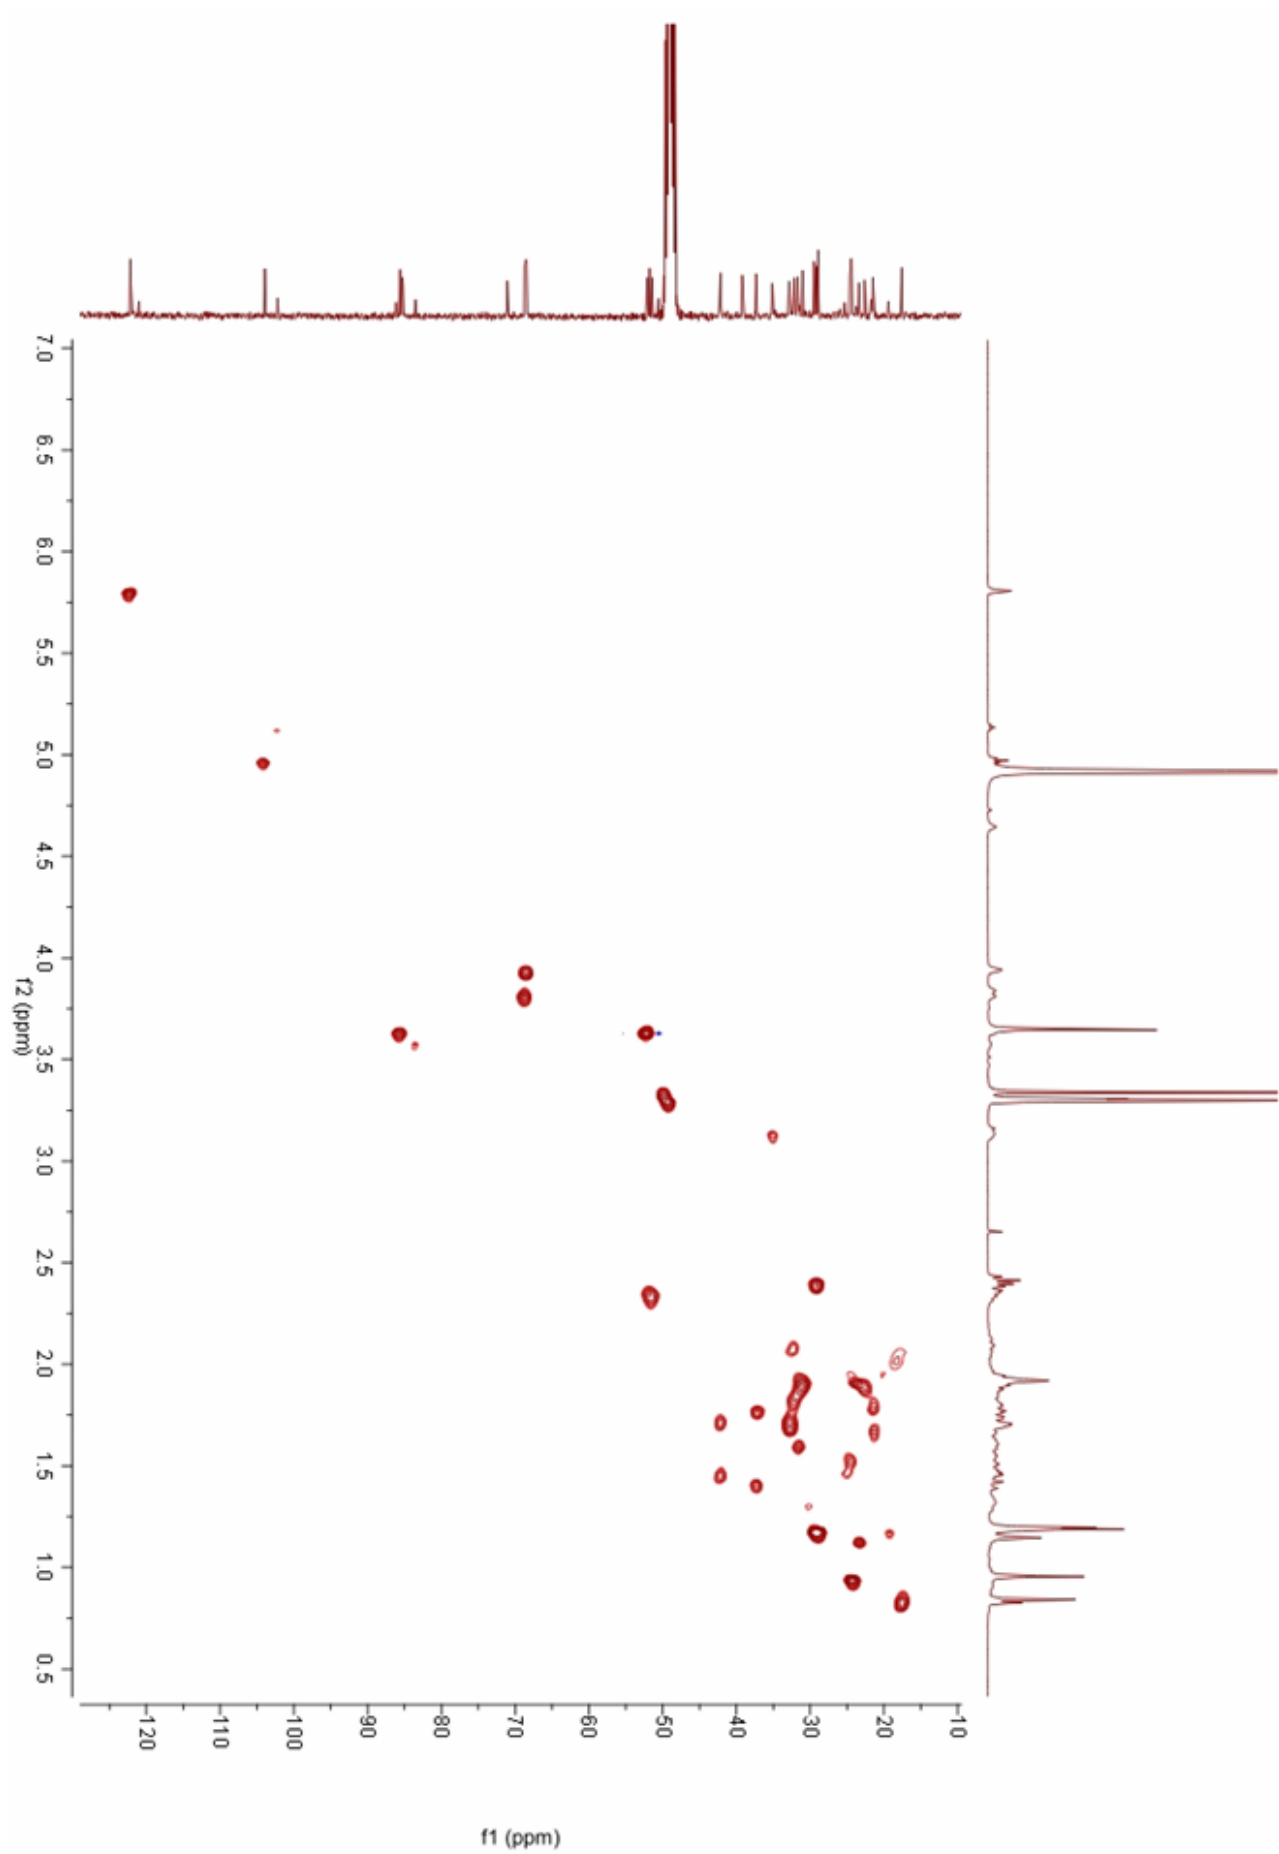

## HMBC of compound 2.

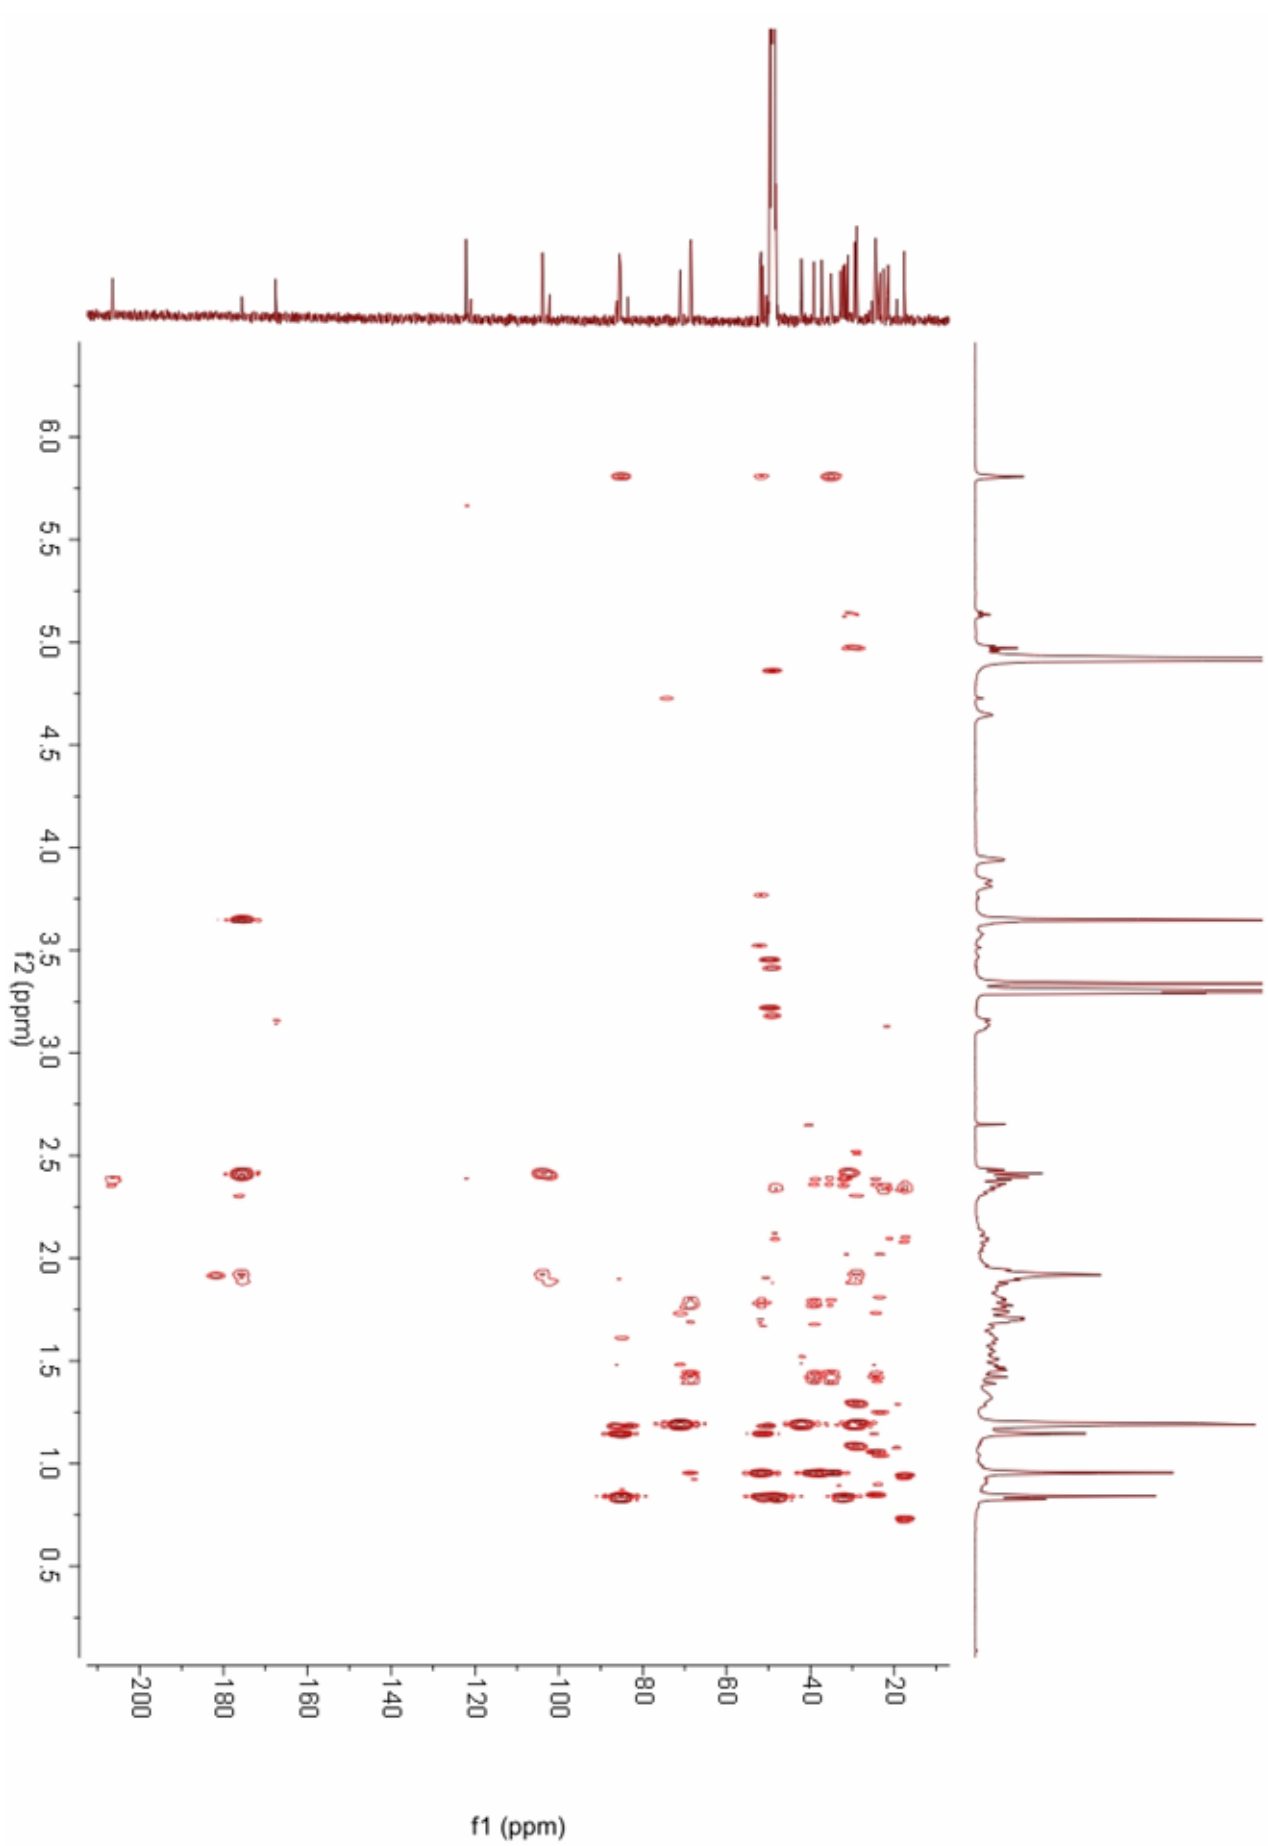

**$^1\text{H}$ - $^1\text{H}$  COSY of compound 2.**

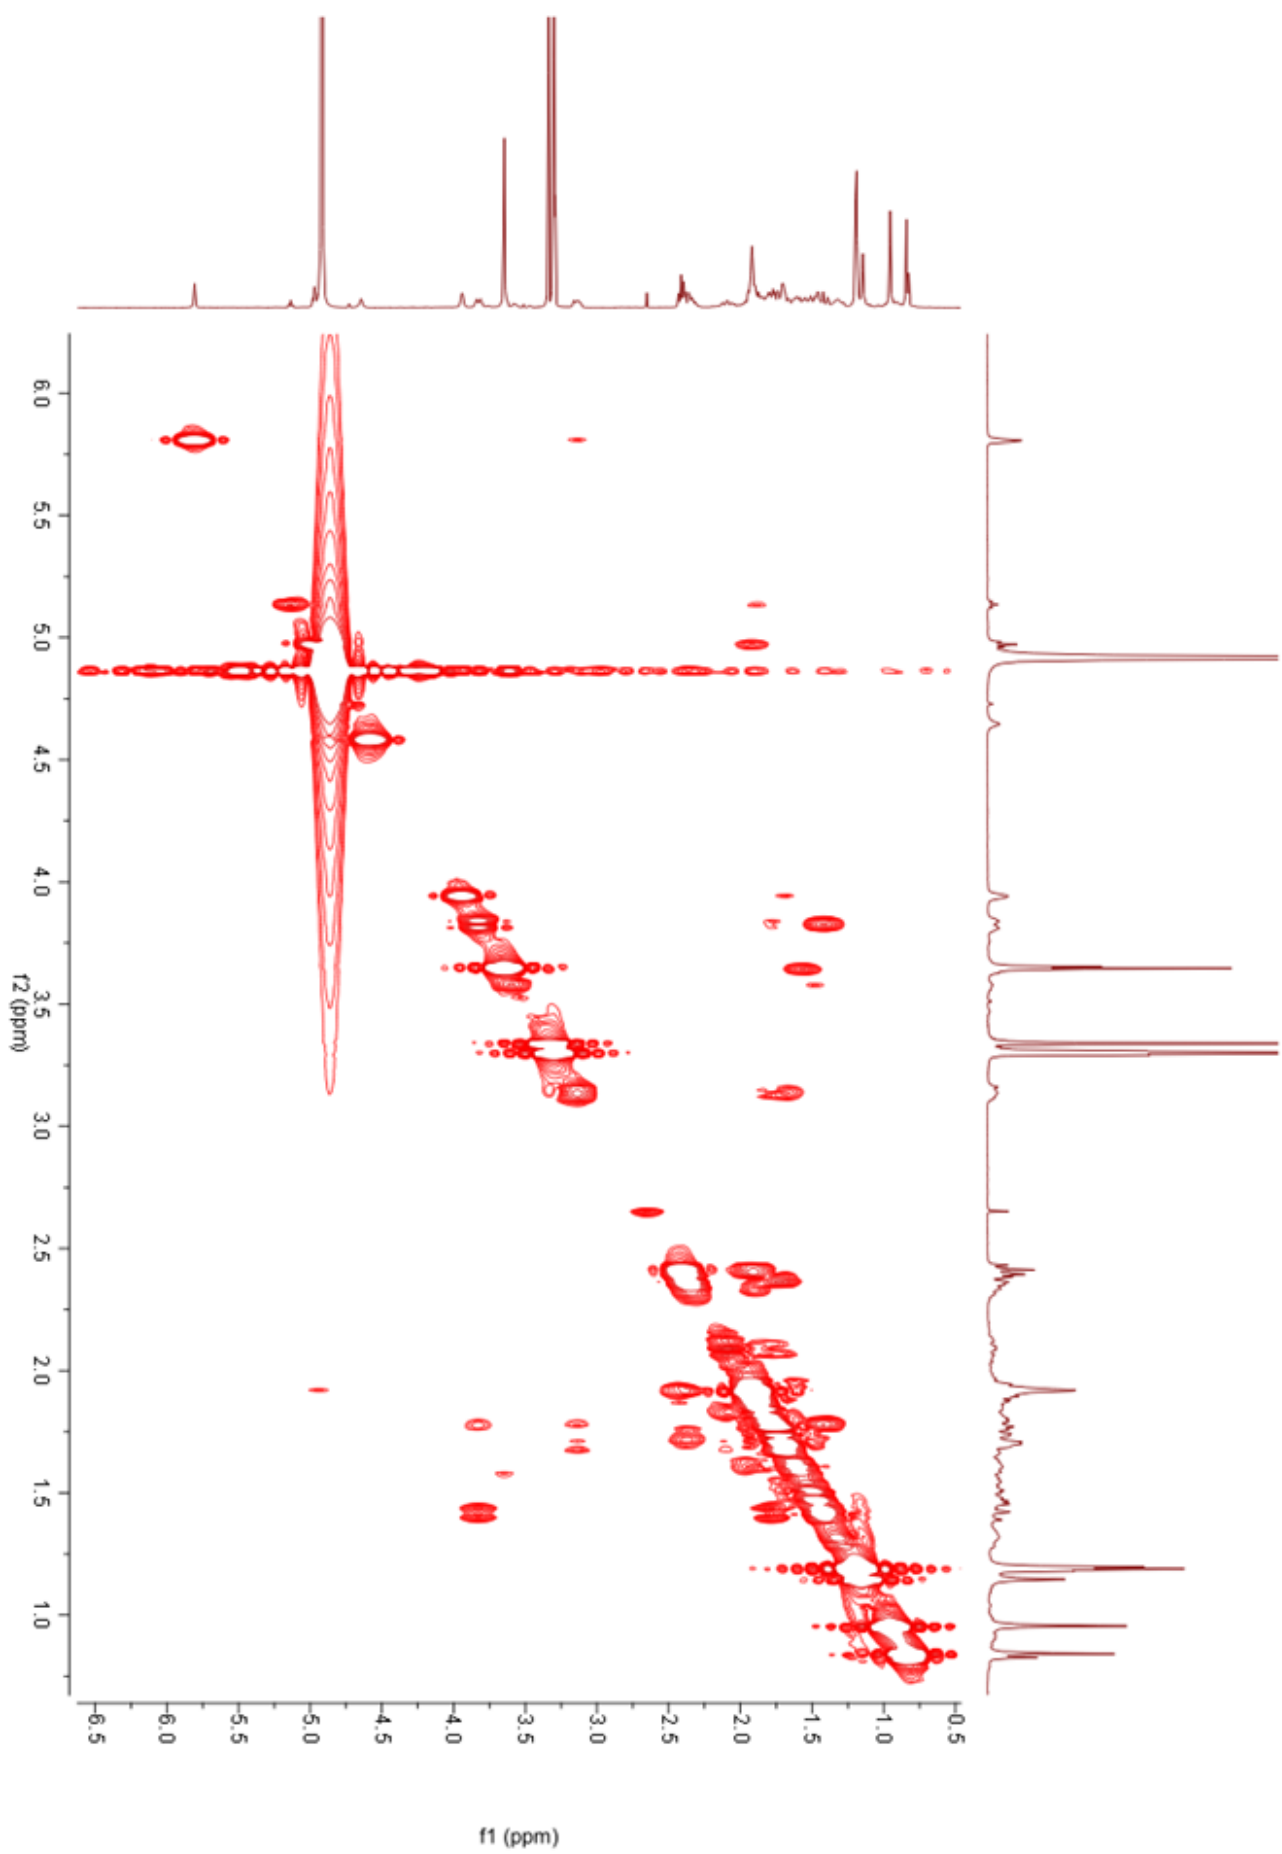

## NOESY of compound 2.

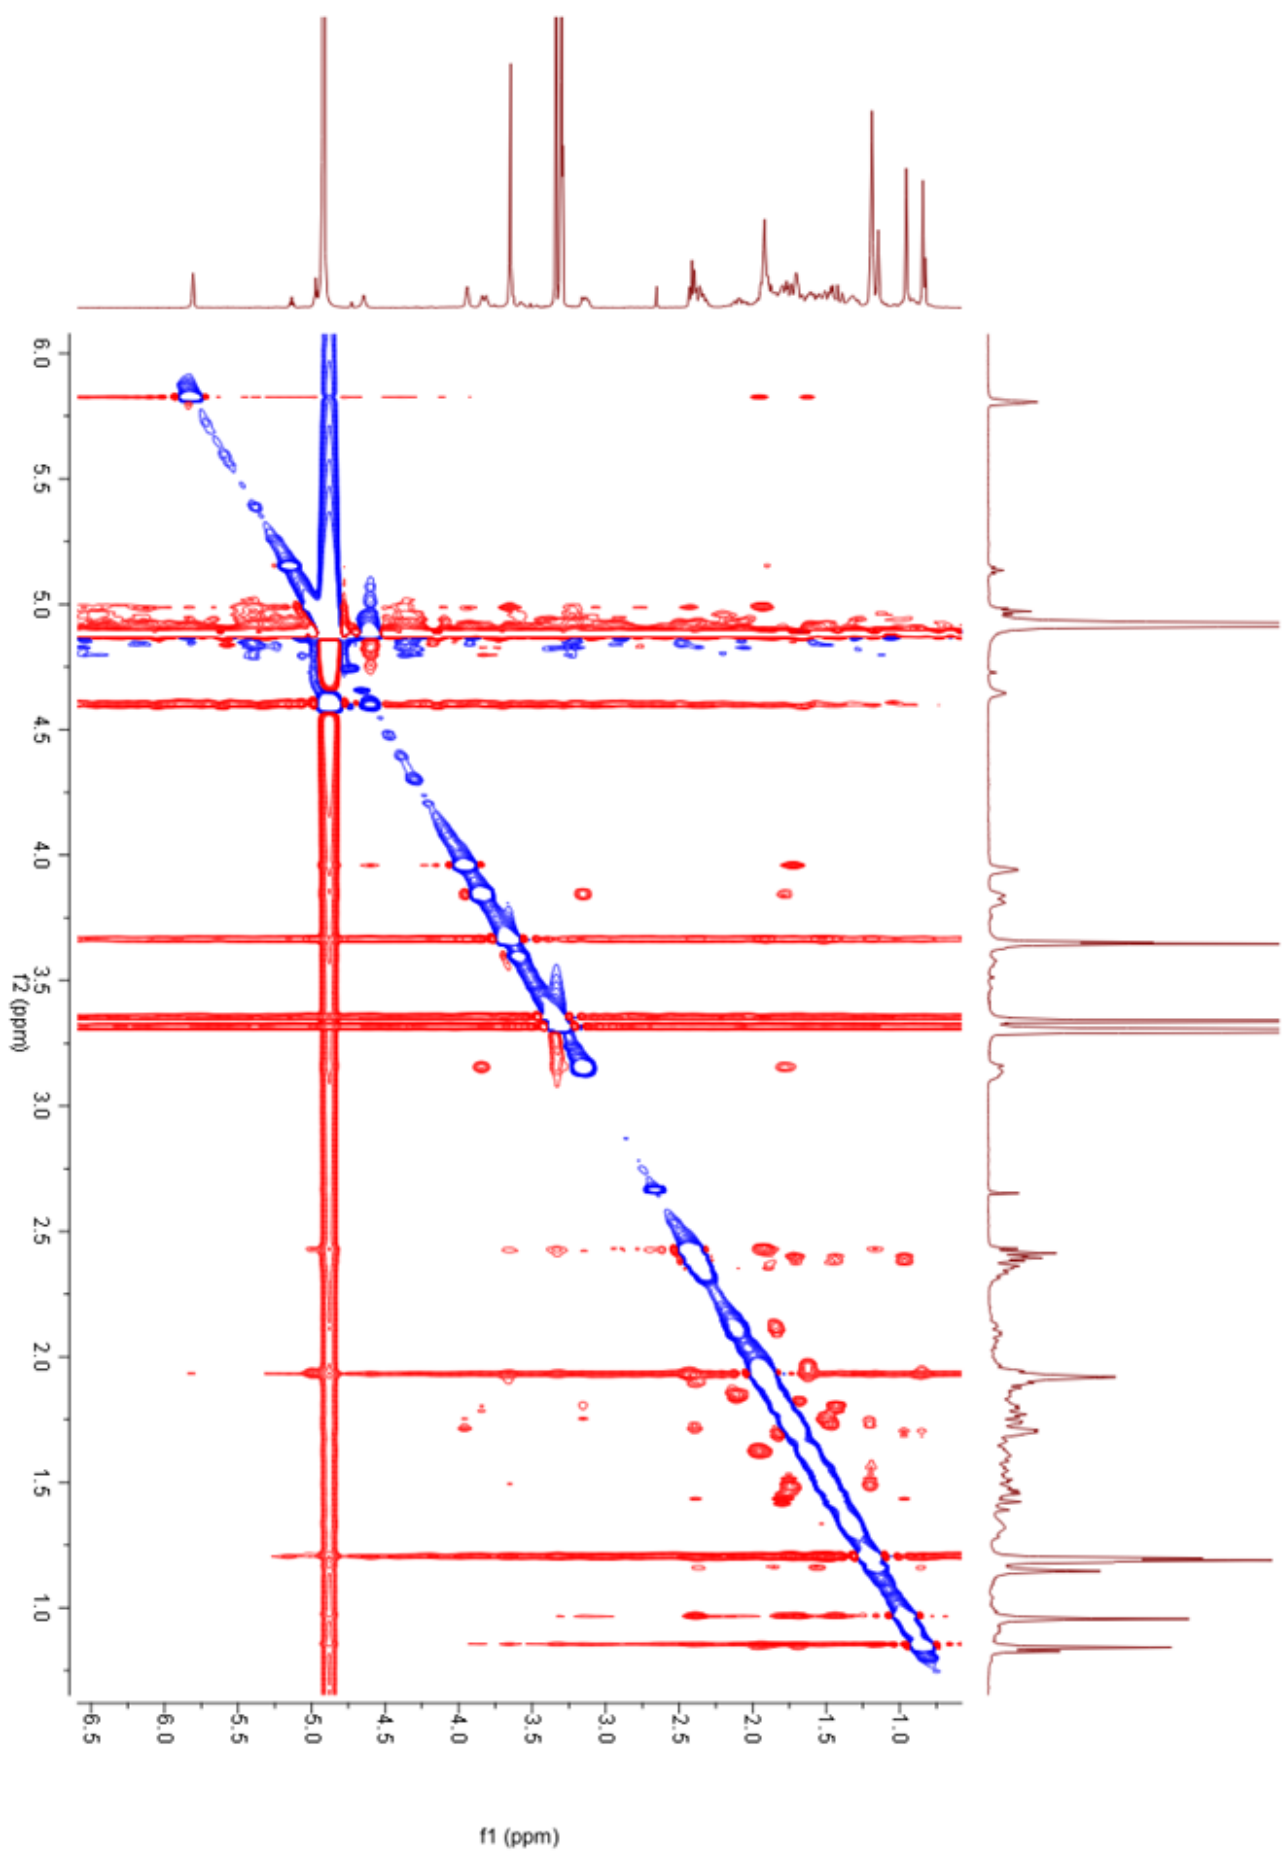

Supplement: s1 [file s1]
